# Supplementary material for: Increased Risk of Cardiovascular Events in Stroke Patients Who had Not Undergone Evaluation for Coronary Artery Disease
Source: PubMed Central journal article supplement — Yonsei Med J. 2016 Nov 7;58(1):114–22. doi: 10.3349/ymj.2017.58.1.114 (PMC5122626; doi:10.3349/ymj.2017.58.1.114), 2016-11-07
Supplement: ymj-58-114-s001.pdf [file ymj-58-114-s001.pdf]

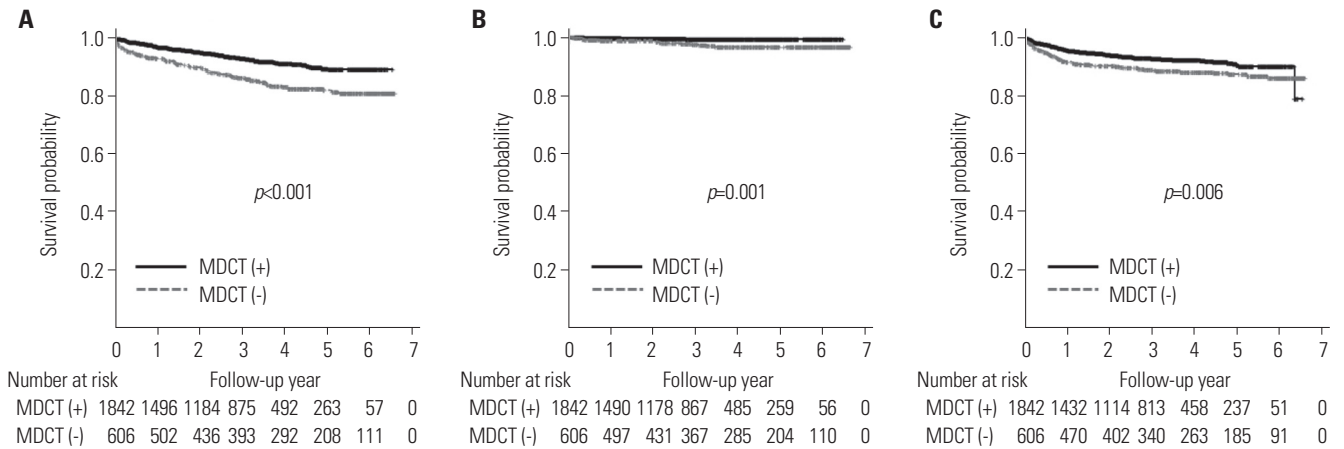

**Supplementary Fig. 1.** Kaplan-Meier survival curves for (A) death (B) cardiovascular events, and (C) recurrent stroke according to the performance of MDCT in the study population ( $n=2448$ ), including the 1842 patients who had undergone MDCT and 606 those who had not undergone MDCT because of nonmedical reasons. MDCT, multi-detector coronary computed tomography.
