# Supplementary material for: Increased Risk of Cardiovascular Events in Stroke Patients Who had Not Undergone Evaluation for Coronary Artery Disease
Source: PubMed Central journal article supplement — Yonsei Med J. 2016 Nov 7;58(1):114–22. doi: 10.3349/ymj.2017.58.1.114 (PMC5122626; doi:10.3349/ymj.2017.58.1.114), 2016-11-07
Supplement: ymj-58-114-s002.pdf [file ymj-58-114-s002.pdf]

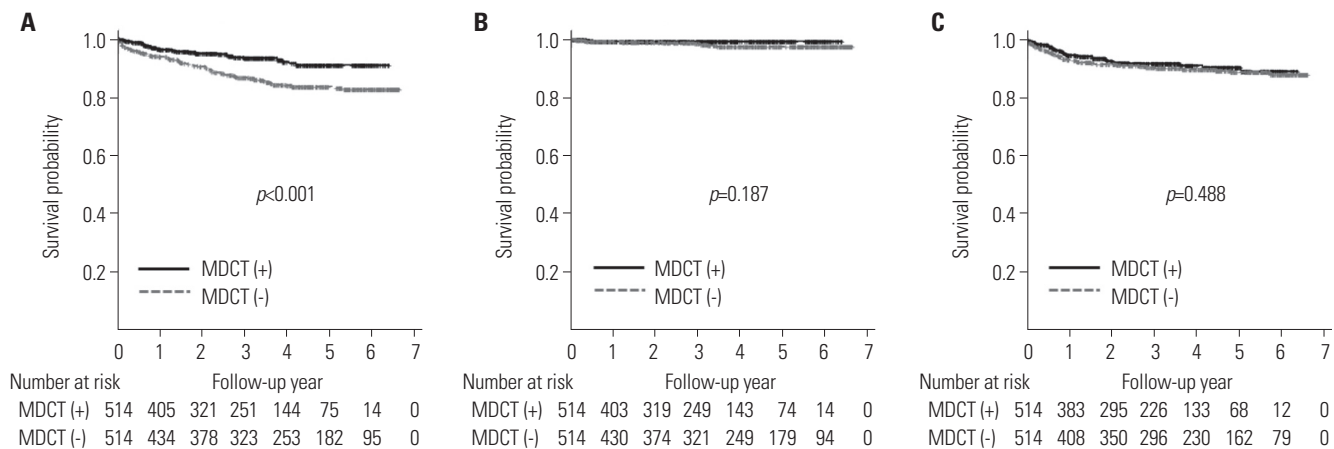

**Supplementary Fig. 2.** Kaplan-Meier survival curves for (A) death (B) cardiovascular events, and (C) recurrent stroke according to the performance of MDCT in the propensity score-matched population (n=1028), including 514 patients who had undergone MDCT and 514 those who had not undergone MDCT because of nonmedical reasons. MDCT, multi-detector coronary computed tomography.
