# Supplementary material for: Increased Risk of Cardiovascular Events in Stroke Patients Who had Not Undergone Evaluation for Coronary Artery Disease
Source: PubMed Central journal article supplement — Yonsei Med J. 2016 Nov 7;58(1):114–22. doi: 10.3349/ymj.2017.58.1.114 (PMC5122626; doi:10.3349/ymj.2017.58.1.114), 2016-11-07
Supplement: ymj-58-114-s003.pdf [file ymj-58-114-s003.pdf]

**Supplementary Table 1.** Baseline Characteristics in Five Strata Defined by Quintiles of Estimated Propensity Scores in the Entire Study Population

| Variable                              | Strata 1         |            | Strata 2         |            | Strata 3         |            | Strata 4         |            | Strata 5         |            |
|---------------------------------------|------------------|------------|------------------|------------|------------------|------------|------------------|------------|------------------|------------|
|                                       | Mean<br>or count | SD<br>or % |
| Age                                   | 55.2             | 10.6       | 63.8             | 9.6        | 67.9             | 11.1       | 68.8             | 10.5       | 72.5             | 10.3       |
| Sex                                   |                  |            |                  |            |                  |            |                  |            |                  |            |
| Female                                | 111              | 17.8       | 240              | 38.5       | 273              | 43.8       | 271              | 43.4       | 336              | 53.9       |
| Male                                  | 512              | 82.2       | 384              | 61.5       | 350              | 56.2       | 353              | 56.6       | 287              | 46.1       |
| Hypertension                          |                  |            |                  |            |                  |            |                  |            |                  |            |
| No                                    | 258              | 41.4       | 148              | 23.7       | 133              | 21.3       | 122              | 19.6       | 106              | 17.0       |
| Yes                                   | 365              | 58.6       | 476              | 76.3       | 490              | 78.7       | 502              | 80.4       | 517              | 83.0       |
| Diabetes                              |                  |            |                  |            |                  |            |                  |            |                  |            |
| No                                    | 502              | 80.6       | 414              | 66.3       | 409              | 65.7       | 399              | 63.9       | 398              | 63.9       |
| Yes                                   | 121              | 19.4       | 210              | 33.7       | 214              | 34.3       | 225              | 36.1       | 225              | 36.1       |
| Hypercholesterolemia                  |                  |            |                  |            |                  |            |                  |            |                  |            |
| No                                    | 523              | 83.9       | 570              | 91.3       | 590              | 94.7       | 580              | 92.9       | 582              | 93.4       |
| Yes                                   | 100              | 16.1       | 54               | 8.7        | 33               | 5.3        | 44               | 7.1        | 41               | 6.6        |
| Current smoker                        |                  |            |                  |            |                  |            |                  |            |                  |            |
| No                                    | 317              | 50.9       | 473              | 75.8       | 502              | 80.6       | 518              | 83.0       | 565              | 90.7       |
| Yes                                   | 306              | 49.1       | 151              | 24.2       | 121              | 19.4       | 106              | 17.0       | 58               | 9.3        |
| Valvular heart disease                |                  |            |                  |            |                  |            |                  |            |                  |            |
| No                                    | 619              | 99.4       | 615              | 98.6       | 600              | 96.3       | 585              | 93.8       | 544              | 87.3       |
| Yes                                   | 4                | 0.6        | 9                | 1.4        | 23               | 3.7        | 39               | 6.3        | 79               | 12.7       |
| Atrial fibrillation                   |                  |            |                  |            |                  |            |                  |            |                  |            |
| No                                    | 616              | 98.9       | 599              | 96.0       | 557              | 89.4       | 451              | 72.3       | 274              | 44.0       |
| Yes                                   | 7                | 1.1        | 25               | 4.0        | 66               | 10.6       | 173              | 27.7       | 349              | 56.0       |
| Congestive heart failure              |                  |            |                  |            |                  |            |                  |            |                  |            |
| No                                    | 622              | 99.8       | 620              | 99.4       | 617              | 99.0       | 608              | 97.4       | 546              | 87.6       |
| Yes                                   | 1                | 0.2        | 4                | 0.6        | 6                | 1.0        | 16               | 2.6        | 77               | 12.4       |
| Previous ischemic stroke              |                  |            |                  |            |                  |            |                  |            |                  |            |
| No                                    | 602              | 96.6       | 571              | 91.5       | 516              | 82.8       | 501              | 80.3       | 446              | 71.6       |
| Yes                                   | 21               | 3.4        | 53               | 8.5        | 107              | 17.2       | 123              | 19.7       | 177              | 28.4       |
| Previous intracranial hemorrhage      |                  |            |                  |            |                  |            |                  |            |                  |            |
| No                                    | 614              | 98.6       | 602              | 96.5       | 601              | 96.5       | 595              | 95.4       | 599              | 96.1       |
| Yes                                   | 9                | 1.4        | 22               | 3.5        | 22               | 3.5        | 29               | 4.6        | 24               | 3.9        |
| Peripheral arterial occlusive disease |                  |            |                  |            |                  |            |                  |            |                  |            |
| No                                    | 608              | 97.6       | 600              | 96.2       | 593              | 95.2       | 578              | 92.6       | 567              | 91.0       |
| Yes                                   | 15               | 2.4        | 24               | 3.8        | 30               | 4.8        | 46               | 7.4        | 56               | 9.0        |
| Metabolic syndrome                    |                  |            |                  |            |                  |            |                  |            |                  |            |
| No                                    | 365              | 58.6       | 346              | 55.4       | 385              | 61.8       | 394              | 63.1       | 405              | 65.0       |
| Yes                                   | 258              | 41.4       | 278              | 44.6       | 238              | 38.2       | 230              | 36.9       | 218              | 35.0       |
| Malignancy                            |                  |            |                  |            |                  |            |                  |            |                  |            |
| No                                    | 608              | 97.6       | 570              | 91.3       | 537              | 86.2       | 524              | 84.0       | 540              | 86.7       |
| Yes                                   | 15               | 2.4        | 54               | 8.7        | 86               | 13.8       | 100              | 16.0       | 83               | 13.3       |
| Chronic kidney disease                |                  |            |                  |            |                  |            |                  |            |                  |            |
| No                                    | 623              | 100.0      | 624              | 100.0      | 623              | 100.0      | 616              | 98.7       | 524              | 84.1       |
| Yes                                   | 0                | 0.0        | 0                | 0.0        | 0                | 0.0        | 8                | 1.3        | 99               | 15.9       |
| Prior antiplatelet use                |                  |            |                  |            |                  |            |                  |            |                  |            |
| No                                    | 439              | 70.5       | 451              | 72.3       | 433              | 69.5       | 456              | 73.1       | 428              | 68.7       |
| Yes                                   | 184              | 29.5       | 173              | 27.7       | 190              | 30.5       | 168              | 26.9       | 195              | 31.3       |
| Prior anticoagulants use              |                  |            |                  |            |                  |            |                  |            |                  |            |
| No                                    | 622              | 99.8       | 620              | 99.4       | 605              | 97.1       | 572              | 91.7       | 513              | 82.3       |
| Yes                                   | 1                | 0.2        | 4                | 0.6        | 18               | 2.9        | 52               | 8.3        | 110              | 17.7       |
| Prior statin use                      |                  |            |                  |            |                  |            |                  |            |                  |            |
| No                                    | 544              | 87.3       | 543              | 87.0       | 536              | 86.0       | 532              | 85.3       | 517              | 83.0       |
| Yes                                   | 79               | 12.7       | 81               | 13.0       | 87               | 14.0       | 92               | 14.7       | 106              | 17.0       |
| Initial NIHSS                         |                  |            |                  |            |                  |            |                  |            |                  |            |
| 0–5                                   | 623              | 100.0      | 614              | 98.4       | 535              | 85.9       | 275              | 44.1       | 135              | 21.7       |
| 6–19                                  | 0                | 0.0        | 10               | 1.6        | 88               | 14.1       | 349              | 55.9       | 343              | 55.1       |
| ≥20                                   | 0                | 0.0        | 0                | 0.0        | 0                | 0.0        | 0                | 0.0        | 145              | 23.3       |
| Concomitant cerebral atherosclerosis  |                  |            |                  |            |                  |            |                  |            |                  |            |
| No                                    | 434              | 69.7       | 299              | 47.9       | 199              | 31.9       | 185              | 29.6       | 143              | 23.0       |
| Yes                                   | 189              | 30.3       | 325              | 52.1       | 424              | 68.1       | 439              | 70.4       | 480              | 77.0       |
| Total cholesterol >6.2 mmol/L         |                  |            |                  |            |                  |            |                  |            |                  |            |
| No                                    | 570              | 91.5       | 574              | 92.0       | 563              | 90.4       | 577              | 92.5       | 580              | 93.1       |
| Yes                                   | 53               | 8.5        | 50               | 8.0        | 60               | 9.6        | 47               | 7.5        | 43               | 6.9        |
| Triglyceride >3.9 mmol/L              |                  |            |                  |            |                  |            |                  |            |                  |            |
| No                                    | 429              | 68.9       | 456              | 73.1       | 475              | 76.2       | 490              | 78.5       | 534              | 85.7       |
| Yes                                   | 194              | 31.1       | 168              | 26.9       | 148              | 23.8       | 134              | 21.5       | 89               | 14.3       |
| High density lipoprotein <1.3 mmol/L  |                  |            |                  |            |                  |            |                  |            |                  |            |
| No                                    | 80               | 12.8       | 132              | 21.2       | 165              | 26.5       | 174              | 27.9       | 205              | 32.9       |
| Yes                                   | 543              | 87.2       | 492              | 78.8       | 458              | 73.5       | 450              | 72.1       | 418              | 67.1       |
| Low density lipoprotein >2.6 mmol/L   |                  |            |                  |            |                  |            |                  |            |                  |            |
| No                                    | 196              | 31.5       | 239              | 38.3       | 269              | 43.2       | 256              | 41.0       | 313              | 50.2       |
| Yes                                   | 427              | 68.5       | 385              | 61.7       | 354              | 56.8       | 368              | 59.0       | 310              | 49.8       |

NIHSS, National Institutes of Health Stroke Scale.
