# Supplementary material for: Increased Risk of Cardiovascular Events in Stroke Patients Who had Not Undergone Evaluation for Coronary Artery Disease
Source: PubMed Central journal article supplement — Yonsei Med J. 2016 Nov 7;58(1):114–22. doi: 10.3349/ymj.2017.58.1.114 (PMC5122626; doi:10.3349/ymj.2017.58.1.114), 2016-11-07
Supplement: ymj-58-114-s004.pdf [file ymj-58-114-s004.pdf]

**Supplementary Table 2.** Comparison of Baseline Characteristics between the Patients Who Had Undergone MDCT and Those Who Had not Undergone MDCT because of Nonmedical Reason

| Variable                              | Before matching (n=2448) |                     |         | After matching (n=1028) |                     |         |
|---------------------------------------|--------------------------|---------------------|---------|-------------------------|---------------------|---------|
|                                       | MDCT (+)<br>(n=1842)     | MDCT (-)<br>(n=606) | p value | MDCT (+)<br>(n=514)     | MDCT (-)<br>(n=514) | p value |
| Age                                   | 64.0±11.1                | 65.5±13.1           | 0.01    | 64.8±11.1               | 65.9±13.3           | 0.912   |
| Male sex                              | 1176 (63.8)              | 343 (56.6)          | 0.001   | 305 (59.3)              | 304 (59.1)          | >0.999  |
| Hypertension                          | 1350 (73.3)              | 463 (76.4)          | 0.129   | 386 (75.1)              | 389 (75.7)          | 0.878   |
| Diabetes                              | 565 (30.7)               | 205 (33.8)          | 0.147   | 184 (35.8)              | 160 (31.1)          | 0.116   |
| Hypercholesterolemia                  | 174 (9.4)                | 54 (8.9)            | 0.694   | 47 (9.1)                | 46 (8.9)            | >0.999  |
| Current smoker                        | 505 (27.4)               | 127 (21.0)          | 0.002   | 115 (22.4)              | 120 (23.3)          | 0.748   |
| Valvular heart disease                | 66 (3.6)                 | 38 (6.3)            | 0.004   | 19 (3.7)                | 23 (4.5)            | 0.636   |
| Atrial fibrillation                   | 245 (13.3)               | 125 (20.6)          | <0.001  | 73 (14.2)               | 83 (16.1)           | 0.378   |
| Congestive heart failure              | 34 (1.8)                 | 19 (3.1)            | 0.058   | 6 (1.2)                 | 14 (2.7)            | 0.115   |
| Previous ischemic stroke              | 235 (12.8)               | 116 (19.1)          | <0.001  | 84 (16.3)               | 73 (14.2)           | 0.343   |
| Previous intracranial hemorrhage      | 59 (3.2)                 | 22 (3.6)            | 0.61    | 18 (3.5)                | 17 (3.3)            | >0.999  |
| Peripheral arterial occlusive disease | 88 (4.8)                 | 29 (4.8)            | 0.994   | 19 (3.7)                | 23 (4.5)            | 0.627   |
| Metabolic syndrome                    | 741 (40.2)               | 227 (37.5)          | 0.226   | 207 (40.3)              | 195 (37.9)          | 0.476   |
| Malignancy                            | 181 (9.8)                | 55 (9.1)            | 0.587   | 50 (9.7)                | 48 (9.3)            | 0.914   |
| Chronic kidney disease                | 29 (1.6)                 | 18 (3.0)            | 0.03    | 9 (1.8)                 | 9 (1.8)             | >0.999  |
| Prior medication                      |                          |                     |         |                         |                     |         |
| Antiplatelet                          | 535 (29.0)               | 179 (29.5)          | 0.817   | 151 (29.4)              | 149 (29.0)          | 0.946   |
| Anticoagulant                         | 71 (3.9)                 | 50 (8.3)            | <0.001  | 18 (3.5)                | 22 (4.3)            | 0.608   |
| Statin                                | 253 (13.7)               | 101 (16.7)          | 0.075   | 72 (14.0)               | 76 (14.8)           | 0.797   |
| Initial NIHSS                         |                          |                     |         |                         |                     |         |
| 0-5                                   | 1478 (80.2)              | 470 (77.6)          | <0.001  | 411 (80.0)              | 408 (79.4)          | 0.949   |
| 6-19                                  | 350 (19.0)               | 119 (19.6)          |         | 101 (19.6)              | 103 (20.0)          |         |
| ≥20                                   | 14 (0.8)                 | 17 (2.8)            |         | 2 (0.4)                 | 3 (0.6)             |         |
| Concomitant cerebral atherosclerosis  | 1011 (54.9)              | 363 (59.9)          | 0.031   | 307 (59.7)              | 304 (59.1)          | 0.894   |
| Total cholesterol >6.2 mmol/L         | 154 (8.4)                | 39 (6.4)            | 0.127   | 29 (5.6)                | 36 (7.0)            | 0.435   |
| Triglyceride >3.9 mmol/L              | 467 (25.4)               | 146 (24.1)          | 0.534   | 126 (24.5)              | 121 (23.5)          | 0.765   |
| High density lipoprotein <1.3 mmol/L  | 1435 (77.9)              | 456 (75.2)          | 0.176   | 398 (77.4)              | 388 (75.5)          | 0.485   |
| Low density lipoprotein >2.6 mmol/L   | 1121 (60.9)              | 332 (54.8)          | 0.008   | 292 (56.8)              | 294 (57.2)          | 0.946   |

MDCT, multi-detector coronary computed tomography; NIHSS, National Institutes of Health Stroke Scale.
