# Supplementary material for: Increased Risk of Cardiovascular Events in Stroke Patients Who had Not Undergone Evaluation for Coronary Artery Disease
Source: PubMed Central journal article supplement — Yonsei Med J. 2016 Nov 7;58(1):114–22. doi: 10.3349/ymj.2017.58.1.114 (PMC5122626; doi:10.3349/ymj.2017.58.1.114), 2016-11-07
Supplement: ymj-58-114-s005.pdf [file ymj-58-114-s005.pdf]

**Supplementary Table 3.** Impact of Not Performing MDCT on Hazard Ratios for Death, Cardiovascular Events, and Recurrent Stroke among Patients Who had Undergone MDCT and Those Who had not Undergone MDCT because of Nonmedical Reasons

| Event                                        | Sample size, no. | Hazard ratio (95% CI) | p value |
|----------------------------------------------|------------------|-----------------------|---------|
| <b>Death</b>                                 |                  |                       |         |
| Unadjusted model                             | 606 and 1842     | 1.932 (1.481–2.520)   | <0.001  |
| Multivariable-adjusted model*                | 606 and 1842     | 1.677 (1.270–2.215)   | <0.001  |
| Propensity score-adjusted model <sup>†</sup> |                  |                       |         |
| Stratification                               | 606 and 1842     | 1.685 (1.287–2.207)   | <0.001  |
| Within-propensity score quintile             |                  |                       |         |
| 1 (lowest propensity)                        | 76 and 414       | 0.596 (0.135–2.628)   | 0.494   |
| 2                                            | 98 and 391       | 2.680 (1.357–5.296)   | 0.005   |
| 3                                            | 112 and 378      | 1.206 (0.641–2.268)   | 0.561   |
| 4                                            | 133 and 357      | 1.655 (0.946–2.895)   | 0.078   |
| 5 (high propensity)                          | 187 and 302      | 1.928 (1.228–3.027)   | 0.004   |
| Regression adjustment                        | 606 and 1842     | 1.635 (1.246–2.146)   | <0.001  |
| Weighting (stabilized IPTW)                  | 606 and 1842     | 1.600 (1.227–2.086)   | 0.001   |
| Matching 1:1                                 | 514 and 514      | 2.000 (1.290–3.100)   | 0.002   |
| <b>Cardiovascular events</b>                 |                  |                       |         |
| Unadjusted model                             | 606 and 1842     | 3.214 (1.603–6.443)   | 0.001   |
| Multivariable-adjusted model*                | 606 and 1842     | 2.528 (1.219–5.243)   | 0.013   |
| Propensity score-adjusted model <sup>†</sup> |                  |                       |         |
| Stratification                               | 606 and 1842     | 2.507 (1.239–5.072)   | 0.011   |
| Within-propensity score quintile             |                  |                       |         |
| 1 (lowest propensity)                        | 76 and 414       | - <sup>‡</sup>        | -       |
| 2                                            | 98 and 391       | 3.490 (0.489–24.913)  | 0.213   |
| 3                                            | 112 and 378      | 0.763 (0.085–6.857)   | 0.809   |
| 4                                            | 133 and 357      | 1.344 (0.246–7.340)   | 0.733   |
| 5 (high propensity)                          | 187 and 302      | 3.518 (1.222–10.131)  | 0.02    |
| Regression adjustment                        | 606 and 1842     | 2.550 (1.250–5.204)   | 0.01    |
| Weighting (stabilized IPTW)                  | 606 and 1842     | 3.051 (1.535–6.063)   | 0.001   |
| Matching 1:1                                 | 514 and 514      | 1.800 (0.603–5.371)   | 0.292   |
| <b>Recurrent stroke</b>                      |                  |                       |         |
| Unadjusted model                             | 606 and 1842     | 1.507 (1.122–2.024)   | 0.006   |
| Multivariable-adjusted model*                | 606 and 1842     | 1.326 (0.981–1.792)   | 0.067   |
| Propensity score-adjusted model <sup>†</sup> |                  |                       |         |
| Stratification                               | 606 and 1842     | 1.324 (0.981–1.786)   | 0.067   |
| Within-propensity score quintile             |                  |                       |         |
| 1 (lowest propensity)                        | 76 and 414       | 0.490 (0.146–1.641)   | 0.247   |
| 2                                            | 98 and 391       | 1.472 (0.607–3.571)   | 0.393   |
| 3                                            | 112 and 378      | 1.804 (0.878–3.707)   | 0.108   |
| 4                                            | 133 and 357      | 1.197 (0.650–2.203)   | 0.564   |
| 5 (high propensity)                          | 187 and 302      | 1.511 (0.924–2.471)   | 0.1     |
| Regression adjustment                        | 606 and 1842     | 1.307 (0.967–1.765)   | 0.081   |
| Weighting (stabilized IPTW)                  | 606 and 1842     | 1.294 (0.961–1.743)   | 0.089   |
| Matching 1:1                                 | 514 and 514      | 1.276 (0.785–2.074)   | 0.326   |

MDCT, multi-detector coronary computed tomography; CI, confidence interval; IPTW, inverse probability of treatment weighting.

\*This model was adjusted for age, sex, hypertension, diabetes, hypercholesterolemia, current smoking status, valvular heart diseases, atrial fibrillation, congestive heart failure, previous ischemic or hemorrhagic stroke, peripheral arterial occlusive diseases, metabolic syndrome, underlying malignancy, chronic kidney disease, prior antiplatelet/anticoagulant/statin use, initial stroke severity, and lipid profiles, <sup>†</sup>The propensity of undergoing MDCT was estimated using a multivariate logistic regression model, which included age, sex, hypertension, diabetes, hypercholesterolemia, current smoking status, valvular heart diseases, atrial fibrillation, congestive heart failure, previous ischemic or hemorrhagic stroke, peripheral arterial occlusive diseases, metabolic syndrome, underlying malignancy, chronic kidney disease, prior antiplatelet/anticoagulant/statin use, initial stroke severity, and lipid profiles, <sup>‡</sup>This could not be estimated because of no event in MDCT (+) group.
